# Supplementary material
Source: PubMed Central journal article supplement (PMC2670124)

## Legends to Supplemental Figures

**Figure S1:** *SRp40 increases the PLP/DM20 ratio.* Representative RT-PCR analysis of PLP and DM20 products derived from PLP-neo and PLP-neo-ISEMT2 amplified from Oli-neu cell transfected with 0.5  $\mu$ g DNA of either pSRp40 or pcDNA3. The PLP/DM20 ratio derived from PLPneo and PLP-neo-ISEMT2 was ~4-fold higher in SRp40 transfected Oli-neu cells. Western blot of cell lysates of Oli-neu cells co-transfected with plasmid expressing SRp40 and probed with anti-SRp40 antibody shows increased expression of SRp40 vs. control cells.

**Figure S2:** *hnRNPH and F regulate the PLP/DM20 ratio in non-glia cells.* Representative RT-PCR analysis of PLP-neo derived PLP and DM20 products amplified from RNA isolated from N2A (**A**) and L cells (**B**) treated with siH3, siF3, siH3+siF3 and siF/H (30 PCR cycles) (n=2). Mock are cells treated with scrambled siRNA.

**Figure S3:** *hnRNPF restores the  $X_L/X_S$  ratio derived from Bcl-x minigene after knock down of hnRNPH/F.* **A.** Schematic drawing of the Bcl-x minigene construct, showing the  $X_L$  and  $X_S$  5' splice sites. The arrowheads indicate the position of the primers used for PCR amplification. **B.** Representative RT-PCR analysis of plasmid derived  $X_L$  and  $X_S$  products amplified from RNA isolated from untreated Oli-neu cells (lane 1), treated with siF/H (lane 2), treated with siF/H and transfected with pFlag-hnRNPF DNA (1  $\mu$ g, lane 3) (PCR cycles= 30). The data are expressed as the  $X_L/X_S$  ratio.

**Figure S4:** *Expression of MS2hnRNPH and F fusion proteins.* Western blot analysis of cell lysates of Oli-neu cells co-transfected with plasmids expressing the fusion

proteins and probed with myc-tag antibody. The hnRNPH and F fusion proteins are expressed in similar amount.

**Figure S1**

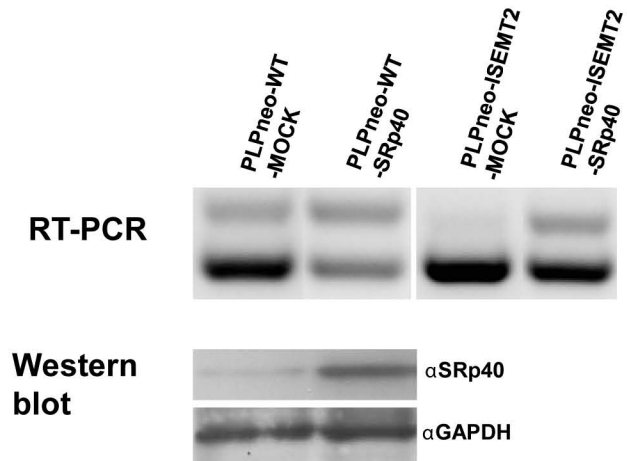

Figure S2

A. N2A cells

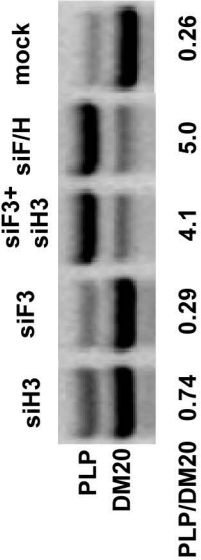

B. L cells

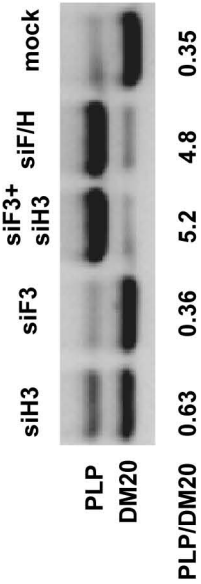

Figure S3

A.

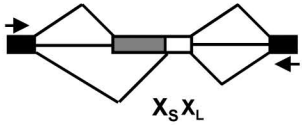

B.

|            |   |   |   |   |
|------------|---|---|---|---|
| Bcl-x      | + | + | + | - |
| siF/H      | - | + | + | - |
| Flag-hnRNP | - | - | + | - |

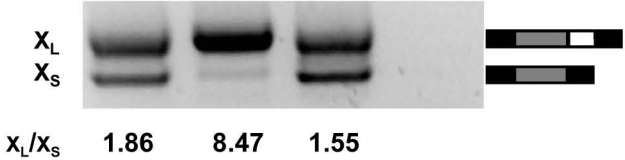

**Figure S4**

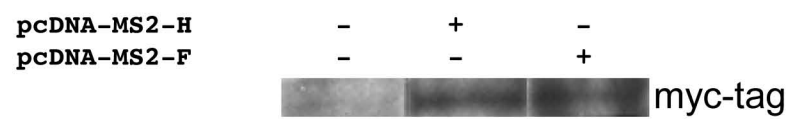

Supplement: M809373200_1.pdf [file M809373200_1.pdf]
