# Supplementary material
Source: PubMed Central journal article supplement (PMC2670124)
Supplement: M809373200_2.pdf [file M809373200_2.pdf]

**Table S1**

---

|                     |                                      |
|---------------------|--------------------------------------|
| Mouse hnRNP F and H | <u>G</u> AATAGGGCACAGGT <u>A</u> TAT |
| Human hnRNP F       | GGATAGGGCACAGGT <u>A</u> CA <u>T</u> |
| Human hnRNPH        | <u>G</u> AATAGGGCACAGGT <u>A</u> TAT |
| Human hnRNPH-MT     | GGATAGGGCACAGGT <u>A</u> CA <u>T</u> |

---

The mouse siF/H targeted sequence is shown. Underlined are the two nucleotide mismatches.
